# Supplementary material
Source: publisher figshare collection journal article supplement (https://gsapubs.figshare.com/ndownloader/files/33661517)
Supplement: Supplementary file 1 [file 33661517]

## Sheet: Lithogeochemical data
Table S2. Lithogeochmical data obtained at the Geological Survey of Newfoundland and Labrador for igneous rocks in central Newfoudland.
Sample ID	Rock type	Host unit	UTM E	UTM N	Zone	Datum	Latitude	longitude	Datum	SiO2	Al2O3	Fe2O3	Fe2O3	FeO	FeOT	MgO	CaO	Na2O	K2O	TiO2	MnO	P2O5	Cr	Zr	Ba	Be	Sc	LOI	Total	F	Total S	Ag	As	Cd	Co	Cu	Li	Mo	Ni	Pb	Rb	V	Zn	Y	Co	Ga	Ge	Sr	Y
										%	%	Total %	%	%	%	%	%	%	%	%	%	%	ppm	ppm	ppm	ppm	ppm	%	%	ppm	ppm	ppm	ppm	ppm	ppm	ppm	ppm	ppm	ppm	ppm	ppm	ppm	ppm	ppm	ppm	ppm	ppm	ppm	ppm
Method										ICP-OES-FUS	ICP-OES-FUS	ICP-OES-FUS	ICP-OES-FUS	ICP-OES-FUS	CALC.	ICP-OES-FUS	ICP-OES-FUS	ICP-OES-FUS	ICP-OES-FUS	ICP-OES-FUS	ICP-OES-FUS	ICP-OES-FUS	ICP-OES-FUS	ICP-OES-FUS	ICP-OES-FUS	ICP-OES-FUS	ICP-OES-FUS	Grav		ISE	IR	ICP-OES	ICP-ES 4-ACID	ICP-ES 4-ACID	ICP-ES 4-ACID	ICP-ES 4-ACID	ICP-ES 4-ACID	ICP-ES 4-ACID	ICP-ES 4-ACID	ICP-ES 4-ACID	ICP-ES 4-ACID	ICP-ES 4-ACID	ICP-ES 4-ACID	ICP-MS-FUS	ICP-MS-FUS	ICP-MS-FUS	ICP-MS-FUS	ICP-MS-FUS	ICP-MS-FUS
Detection limit										-0.01	-0.01	-0.01	-0.01	-0.01		-0.01	-0.01	-0.01	-0.01	-0.001	-0.001	-0.001	-1	-1	-1	-0.2	-1	-0.01		-1	-20, -100	-0.1, -0.05	-1	-0.1	-1	-1	-0.1	-1	-1	-1	-1	-1	-1	-5	-1	-1	-1	-1	-1
HS12-134	silicic tuff	Stony Lake Volcanics	594402	5393116	21	NAD 27				73.5301	13.3595	3.14234	1.37585	1.59	2.82748	0.581021	0.667656	3.35361	2.77787	0.371289	0.057945	0.0392945	25.0237	405.853	604.984	3.76485	6.17794	2.20801	100.089	442.699	N/A	-0.05	2.62651	N/A	N/A	17.5425	26.5312	N/A	14.2195	60.0755	127.775	N/A	130.983	33.05	4.793	28.87	4.605	94.61	80.77
HS12-135	silicic tuff	Stony Lake Volcanics	594583	5392981	21	NAD 27				69.793	13.5531	2.58464	0.384864	1.98	2.32566	0.635456	1.29623	3.28229	3.28446	0.297682	0.0851177	0.0351617	22.4755	312.366	576.25	4.38429	4.776	3.3709	98.2181	675.188	N/A	-0.05	8.76975	N/A	N/A	9.57031	33.4723	N/A	13.5412	22.6118	147.62	N/A	132.698	36.74	3.986	35.11	5.518	103.5	101.4
HS12-138	silicic tuff	Stony Lake Volcanics	576661	5395339	21	NAD 27				72.9474	12.6061	2.56586	2.12146	0.4	2.30876	0.108662	0.478883	3.03128	4.80296	0.2317	0.0233958	0.0308532	-1	246.447	472.381	3.98456	9.20745	1.24211	98.0691	428.199	N/A	-0.05	3.9172	N/A	N/A	7.08258	20.7235	N/A	5.88895	15.5097	210.195	N/A	77.807	6.6	2.024	31.86	3.353	31.1	71.15
HS12-139	silicic tuff	Stony Lake Volcanics	577479	5396425	21	NAD 27				77.4431	12.2754	1.79645	1.48537	0.28	1.61645	0.191291	0.201056	2.54232	4.13933	0.208227	0.0151116	0.0256366	2.17508	283.059	442.216	2.94011	7.26278	1.19605	100.034	347.609	N/A	0.070097	4.09884	N/A	N/A	2.79198	21.343	N/A	3.89525	15.103	142.503	N/A	58.8872	10	1.136	23.49	5.774	39.41	77.99
HS12-140	silicic tuff	Stony Lake Volcanics	578851	5399868	21	NAD 27				73.1959	13.0991	2.73762	2.44876	0.26	2.46331	0.111526	0.0767254	2.39209	5.38396	0.224869	0.0670548	0.0526507	-1	260.223	731.814	2.97807	7.62135	1.34906	98.6906	178.346	N/A	-0.05	66.0237	N/A	N/A	7.54823	27.5669	N/A	5.03876	28.5372	206.098	N/A	89.8213	-5	1.766	24.27	4.489	25.86	55.97
HS12-167	silicic tuff	Stony Lake Volcanics	580089	5392725	21	NAD 27				72.3768	12.1059	2.95388	1.07629	1.69	2.6579	0.377902	0.783894	3.36841	4.25149	0.281067	0.0669453	0.0258673	18.9198	358.562	804.293	2.98667	4.79443	2.04306	98.6352	622.544	N/A	0.114462	6.02058	N/A	N/A	12.0677	61.1801	N/A	11.2877	19.6946	168.356	N/A	129.85	22.87	3.193	28.57	4.971	67.01	89.11
HS12-168	silicic tuff	Stony Lake Volcanics	580286	5392581	21	NAD 27				71.2432	12.5366	3.26349	0.885945	2.14	2.93648	0.688862	1.13863	3.17746	3.86811	0.334835	0.073525	0.0363934	24.2346	359.978	763.926	3.64396	6.04002	2.03693	98.3981	559.353	N/A	-0.05	6.46072	N/A	N/A	7.72393	59.3297	N/A	14.1622	16.0375	145.152	N/A	119.072	28.87	4.561	25.85	4.744	97.65	74.81
HS12-169	silicic tuff	Stony Lake Volcanics	579195	5931932	21	NAD 27				72.9896	12.6023	3.07657	2.19888	0.79	2.7683	0.404359	0.391268	3.8464	3.33024	0.314066	0.070183	0.0413205	20.2392	403.777	686.469	4.25514	5.82812	1.46102	98.5273	582.182	N/A	-0.05	4.37404	N/A	N/A	12.9638	63.67	N/A	13.5512	18.6701	131.427	N/A	136.968	26.96	3.108	27.17	4.885	67.22	85.58
HS13-039	conglomerate	Rogerson Lake Conglomerate	583852	5403422	21	NAD83				71.59	12.86	4.12	0.83	2.96	3.70718	1.08	0.56	0.23	2.64	0.594	0.035	0.104	23	294	1520	2.2	8.2	4.35	98.18	412	-100	-0.1	95	0.1	N/A	15	336.7	-1	15	11	96	N/A	66	N/A	8	19	3	31	36
HS13-083	monzonite	Paradise Lake monzonite	600718	5398247	21	NAD27				85.1597	6.68497	3.20311	1.99212	1.09	2.88216	0.18871	0.133339	0.0361236	1.73545	0.226389	0.0663339	0.0297928	5.40449	225.924	172.325	1.68463	6.80189	2.26592	99.7299	225.897	47.4672	-0.1	4.58203	0.121188	N/A	4.11369	66.8979	-1	4.39569	25.4045	78.8457	N/A	44.1078	8.84456	-5	11.4615	-1	11.864	31.006
HS13-083A	monzonite	Paradise Lake monzonite	600718	5398247	21	NAD27				69.0165	13.2169	5.59836	3.72077	1.69	5.0374	0.189407	2.22201	4.13514	3.4969	0.43967	0.130224	0.083335	-1	587.025	524	2.87152	16.3339	1.13397	99.6623	146.53	N/A	-0.05	3.07851	N/A	N/A	6.91595	8.60533	N/A	7.19944	34.2824	136.915	N/A	95.8171	9.667	1.302	26.04	5.314	123.7	64.63
HS13-083B	quartz breccia	Paradise Lake monzonite	600718	5398247	21	NAD27				82.1471	9.83612	2.00761	1.59654	0.37	1.80645	0.0799134	0.0497854	0.0299808	2.68033	0.270208	0.0181698	0.0327202	-1	371.648	253.801	2.63189	10.2378	2.09335	99.2453	528.175	N/A	-0.05	18.0202	N/A	N/A	3.57655	40.2662	N/A	3.18761	12.03	138.996	N/A	55.3133	7.526	-1	21.73	3.189	35.95	50.1
HS13-083C	quartz breccia	Paradise Lake monzonite	600718	5398247	21	NAD27				93.7402	2.37598	1.39702	1.08594	0.28	1.25704	0.0307616	0.0535024	0.036785	0.294981	0.0516911	0.0128541	0.00885739	-1	60.841	198.13	2.58064	5.99982	1.19928	99.2019	77.3648	N/A	-0.05	2.4155	N/A	N/A	4.53701	136.253	N/A	2.4703	2.83743	11.8292	N/A	15.1162	20	0.563	6.574	1.916	42.96	8.362
HS13-084	monzonite	Paradise Lake monzonite	600737	5398178	21	NAD27				69.4043	13.2996	5.53199	2.13233	3.06	4.97768	0.16239	1.96889	4.2526	3.47845	0.429338	0.182567	0.0699213	-1	541.863	567.902	3.43274	16.6204	0.930558	99.7106	523.077	N/A	-0.05	4.70494	N/A	N/A	9.3837	10.7264	N/A	7.06634	16.9256	141.01	N/A	124.641	-5	1.379	26.44	4.956	108.1	75.21
HS13-087A	monzonite	Paradise Lake monzonite	600324	5398446	21	NAD 27				72.3219	13.3782	4.26334	2.58573	1.51	3.83616	0.0343282	1.40796	4.0421	4.24042	0.303178	0.106119	0.0290731	-1	528.681	593.853	3.86199	10.5836	0.859742	100.986	545.422	N/A	-0.05	2.26063	N/A	N/A	4.66803	4.38221	N/A	5.28716	20.1446	166.19	N/A	119.729	-5	-1	26.96	5.112	88.53	73.64
HS13-087B	quartz vein	Paradise Lake monzonite	600324	5398446	21	NAD 27				93.6618	2.89232	0.77079	0.48193	0.26	0.693557	0.0394526	0.0313152	0.0312488	0.514743	0.0546656	0.00750351	0.00575607	-1	81.4756	106.325	1.59557	2.42991	0.882914	98.8925	95.0911	N/A	-0.05	3.20798	N/A	N/A	5.25907	101.144	N/A	2.38142	10.2164	28.6485	N/A	22.4887	19.54	0.52	6.444	1.067	13.45	11.64
HS13-087C	altered monzonite	Paradise Lake monzonite	600324	5398446	21	NAD 27				68.241	13.5195	4.97966	4.27973	0.63	4.48069	0.0421726	1.42562	4.00162	2.05568	0.368965	0.112806	0.0306052	-1	613.043	345.127	2.27116	11.0507	2.79028	97.5679	N/A	N/A	-0.05	N/A	N/A	N/A	6.88224	3.74361	N/A	6.00387	3.42445	114.444	N/A	82.5492	7.029	0.849	27.15	3.153	54.72	84.9
HS16-003B	basalt	Laurenceton Formation	626788	5451691	21	NAD 27				54.6538	14.8495	7.32778	5.06134	2.04	6.59354	3.07277	8.67788	3.21988	0.685575	1.04191	0.170279	0.196655	67.8	130.044	243.809	0.981807	18.886	4.55818	98.4542	156.316	N/A	-0.1	14.544	0.213963	24.4868	6.70724	24.1057	N/A	41.4955	-1	29.9133	118.208	61.8386	N/A	N/A	14.64	3.273	445.1	17.32
HS16-003C	andesite	Laurenceton Formation	626898	5451667	21	NAD 27				56.3489	16.6969	7.4447	1.5564	5.3	6.69874	4.10659	6.16449	3.65387	0.746003	1.19022	0.127864	0.230239	52.2964	139.271	227.544	0.993565	20.6673	3.81695	100.527	179.738	N/A	-0.1	39.6525	0.249869	26.8413	18.0453	19.4427	N/A	38.4615	-1	25.7129	157.398	70.9054	N/A	N/A	15.51	2.998	323.5	18.29
HS16-004	basalt	Laurenceton Formation	632027	5455688	21	NAD 27				48.1471	17.5997	10.8351	8.40197	2.19	9.74939	5.72041	7.98655	3.27933	0.146452	1.38414	0.112994	0.236073	373.719	114.768	101.593	0.7585	28.5501	3.48756	98.9354	188.525	N/A	-0.1	15.4762	0.249029	44.861	9.11138	18.735	N/A	134.551	1.71234	9.12825	154.824	80.5223	N/A	N/A	16.5	3.073	1040	18.64
HS16-005	trachytic basalt	Laurenceton Formation	632169	5455878	21	NAD 27				47.254	17.3111	11.2594	8.25966	2.7	10.1312	3.69809	5.38813	3.52591	0.628039	2.41888	0.17233	0.492671	34.4222	252.915	187.721	1.55992	29.3839	6.03638	98.1848	306.226	N/A	-0.1	17.1015	0.264987	32.5863	17.0895	26.8118	N/A	25.6806	-1	26.3383	261.84	96.125	N/A	N/A	18.35	3.782	347.7	36.52
HS16-012	basalt	Laurenceton Formation	616764	5431417	21	NAD 27				46.0396	16.2766	8.72841	2.45126	5.65	7.85382	6.09444	8.30356	2.83535	0.540278	1.84392	0.115251	0.255607	139.022	154.904	107.699	0.75848	27.4819	7.27854	98.3116	244.772	N/A	-0.1	6.70927	0.149516	42.4216	14.4322	21.294	N/A	75.3015	-1	24.1753	213.362	72.066	N/A	N/A	14.7265	3.786	403.909	24.031
HS17-039	basalt	Laurenceton Formation	663058	5456271	21	NAD 27				49.1505	16.2421	9.04861	3.21586	5.25	8.14194	7.95848	7.08135	3.42141	0.231376	1.38323	0.121611	0.243394	190.345	110.274	106.295	0.760692	28.178	5.3336	100.216	174.031	N/A	-0.1	4.23748	0.158031	35.6305	36.225	23.1757	N/A	70.7703	-1	11.9205	190.441	72.1835	N/A	N/A	17.8635	1.4815	398.25	18.7105
HS18-094A	basalt	Laurenceton Formation					49.3863	54.6367	WGS84	48.7582	15.8712	9.11979	1.20947	7.12	8.20599	7.51543	7.83333	1.76299	3.03779	1.12612	0.163566	0.103113	298.836	90.4144	784.916	0.707195	37.1569	3.84423	99.1358	69.3656	397.781	-0.1	3.60351	0.210455	40.757	40.8333	42.3375	-1	64.6991	-1	90.5716	227.086	68.1942	N/A	N/A	14.5615	-1	241.154	21.626
HS18-094B	basalt	Laurenceton Formation					49.3863	54.6367	WGS84	48.3462	15.6334	9.60832	0.875865	7.86	8.64557	8.05791	4.49098	4.19789	0.0508084	1.1728	0.188376	0.120498	270.704	95.4943	125.201	0.776928	37.6948	7.08866	98.9559	144.602	43.2249	-0.1	47.3994	0.332327	41.1268	49.1297	78.5824	-1	58.9697	-1	11.6361	242.85	75.0421	N/A	N/A	13.9415	-1	152.654	22.156
HS18-101	basalt	Laurenceton Formation					49.4252	54.5805	WGS84	47.0234	15.8095	9.04774	0.604143	7.6	8.14116	9.55905	8.41554	3.14637	0.0448722	0.99301	0.175032	0.0931138	364.259	73.2871	46.6057	0.580158	34.1941	4.21705	98.5247	92.3066	88.3115	-0.1	3.44801	0.276497	49.4717	74.3762	60.3228	-1	100.94	-1	8.68569	215.249	73.0377	N/A	N/A	11.8815	-1	117.254	18.426
HS18-112A	mineralized quartz vein	Rogerson Lake Conglomerate	518390	5368252	21	NAD83				99.4582	0.121056	0.451614	NA	NA	0.406362	0.0268689	0.0344668	0.0147875	0.0191696	0.00508921	0.00384292	-0.002	4.04773	-5	3.31696	-0.2	-1	0.289855	100.425	31.5398	27.7392	-0.1	1.80973	-0.1	-5	17.3545	0.110204	-1	1.4649	8.26177	-5	-1	2.74089	N/A	N/A	-1	2.469	-1	-1
HS18-112B	laminated quartz vein	Rogerson Lake Conglomerate	518393	5368248	21	NAD83				96.3392	1.18563	0.902405	0.0580446	0.76	0.811984	-0.02	0.0409505	0.0633713	0.25175	0.042469	0.0147334	0.0153686	12.2617	9.75743	43.2651	-0.2	1.23477	0.549505	99.4228	90.4548	254.315	0.946513	9.65375	-0.1	-5	82.6889	3.40744	13.2695	3.48468	24.0332	8.44454	11.0554	10.427	N/A	N/A	-1	3.236	6.8355	1.4045
HS18-112C	altered conglomerate	Rogerson Lake Conglomerate	518398	5368251	21	NAD83				70.1646	14.0039	5.59708	5.14157	0.41	5.03625	0.140326	0.230866	0.59998	3.3606	0.917255	0.142603	0.162115	46.2297	111.369	590.271	1.5128	15.9548	3.21743	98.5368	415.157	1661.95	0.189018	10.5086	0.314751	15.9828	88.9296	3.84128	1.42735	25.1801	6.45406	107.866	111.23	68.2401	N/A	N/A	13.188	1.757	68.7085	21.7835
HS18-114	chalcopyrite-malachite mineralized quartz	Rogerson Lake Conglomerate	518447	5368293	21	NAD83				90.8514	0.356456	5.95472	4.27711	1.51	5.35806	-0.02	0.072639	0.029562	0.0666684	0.0152392	0.0149301	0.0133191	6.20839	7.81231	14.1153	-0.2	-1	1.28897	98.6795	38.7335	3762.35	6.81728	24.8777	0.180939	47.3171	710.737	2.08173	5.64655	25.7512	125.252	-5	2.91769	9.49314	N/A	N/A	-1	1.772	4.6245	2.0735
HS18-115	chalcopyrite-malachite mineralized quartz	Rogerson Lake Conglomerate	518440	5368252	21	NAD83				16.4278	0.112588	35.0273	29.9167	4.6	31.5176	-0.02	0.0351903	0.010732	-0.01	0.00482348	0.0252592	-0.002	4.16602	8.75697	2.46151	-0.2	1.59777	12.6621	64.2648	21.9037	207000	33.7705	4.61879	0.728736	17.2421	281000	0.100173	3.32223	36.1519	-1	-5	-1	265.662	N/A	N/A	-1	-1	-1	1.0515
HS18-118A	altered rhyolite	Silurian felsic volcanic rock	518252	5367610	21	NAD83				68.6865	14.7102	4.0673	2.02306	1.84	3.65976	0.257495	0.797228	3.41112	2.91213	0.346864	0.115929	0.065044	2.44168	536.849	904.781	3.18177	16.5149	2.84488	98.2147	509.419	3264.96	1.95336	357.572	8.32951	-5	25.6869	14.9408	3.44697	6.37468	1051.17	127.927	16.5289	787.211	N/A	N/A	25.368	1.722	45.9385	59.9035
HS18-118B	galena-bearing quartz vein	Silurian felsic volcanic rock	518258	5367613	21	NAD83				97.0841	0.263155	0.750795	NA	NA	0.675565	0.0204483	0.0610932	0.0311904	0.0454746	0.0754687	0.00702104	0.00363036	5.94004	34.6565	32.5923	-0.2	-1	0.119904	98.4623	47.3073	213.982	0.186491	2.3583	-0.1	-5	181.823	21.3503	4.54442	2.20308	7.01371	-5	3.33227	18.6959	N/A	N/A	-1	-1	3.7925	3.0045
HS18-120A	altered dyke	Devonian dyke	518199	5367855	21	NAD83				52.9366	15.2236	14.3107	8.06684	5.62	12.8767	1.88488	0.385016	3.28018	0.647184	2.80077	0.229123	0.283462	66.3355	206.913	304.985	1.24394	42.4223	6.51284	98.4944	263.491	190.118	0.458276	27.7934	1.03122	51.1505	34.737	75.4332	1.28866	39.7792	26.9134	23.249	314.695	160.479	N/A	N/A	17.398	1.827	114.828	40.5135
HS18-120B	altered basalt dyke	Devonian dyke	518200	5367850	21	NAD83				51.9161	15.3564	13.2607	6.11698	6.43	11.932	3.35906	2.26304	4.12188	0.132207	2.56438	0.234471	0.286492	68.9266	193.827	89.4206	1.55822	43.3856	5.19118	98.6859	246.871	35.737	0.422368	17.0782	0.589366	55.8471	200.656	80.4345	-1	39.9389	7.25996	-5	309.029	124.068	N/A	N/A	17.248	1.652	223.228	40.7635
HS18-122A	laminated quartz vein	Rogerson Lake Conglomerate	518355	5368229	21	NAD83				98.1479	0.175984	0.898347	NA	NA	0.808332	-0.02	0.0186883	0.0183651	0.0393224	0.00858134	0.00920658	0.00373404	5.4237	5.12596	8.08776	-0.2	-1	0.289479	99.6148	43.0994	424.969	7.17425	22.3057	0.147983	-5	1705.46	0.53623	9.16843	2.75509	75.3518	-5	1.97835	57.9252	N/A	N/A	-1	1.823	3.5395	-1
HS18-122B	altered conglomerate	Rogerson Lake Conglomerate	518355	5368232	21	NAD83				84.0374	7.72497	2.90262	2.30268	0.54	2.61177	0.0833983	0.0571062	0.316708	1.89318	0.311961	0.0700345	0.0573877	24.6358	65.2255	358.463	0.736047	7.52989	1.80765	99.2624	246.233	788.33	0.34118	6.39958	0.296916	23.1757	33.0862	7.85604	4.88743	11.7291	8.72441	67.5131	69.3839	68.5857	N/A	N/A	7.318	2.055	25.6685	7.5215
HS18-122C	altered conglomerate	Rogerson Lake Conglomerate	518355	5368227	21	NAD83				82.8329	7.60569	3.68889	3.15561	0.48	3.31926	0.0967381	0.086384	0.318797	1.85011	0.296805	0.142567	0.0720797	26.2846	77.8438	398.746	0.825955	9.87833	1.81727	98.8082	223.675	82.0283	0.244512	3.08802	0.285606	9.52304	55.8721	2.83176	3.07857	15.742	9.17924	65.8498	65.9253	59.7857	N/A	N/A	7.156	1.705	29.3585	12.2035
HS18-125B	altered conglomerate	Rogerson Lake Conglomerate	518314	5368208	21	NAD83				76.4565	11.0454	4.28865	3.81092	0.43	3.85893	0.100691	0.148515	0.488913	2.64791	0.415042	0.116091	0.0963363	39.7645	119.036	641.235	1.16032	11.521	2.33626	98.1403	304.757	204.297	0.89823	10.2079	0.472177	13.8918	543.26	3.4963	1.01577	18.7466	11.8474	92.7045	72.689	93.4337	N/A	N/A	9.908	1.632	47.7985	20.0335
HS18-125C	altered conglomerate	Rogerson Lake Conglomerate	518314	5368208	21	NAD83				74.8999	12.2792	3.93252	3.18815	0.67	3.53848	0.114125	0.169851	0.514613	3.01158	0.455713	0.127022	0.103502	38.2768	127.576	626.495	1.37579	13.1234	2.45607	98.0641	363.556	124.915	0.126889	11.8743	0.150169	10.4128	173.917	3.62967	-1	20.2539	5.44786	102.32	83.7494	50.141	N/A	N/A	10.848	1.792	43.9585	16.0435
HS18-127	mineralized quartz vein	Rogerson Lake Conglomerate	518335	5368225	21	NAD83				94.7011	0.231567	1.97706	0.777182	1.08	1.77896	-0.02	0.0341409	0.0249543	0.0478138	0.0105002	0.0132792	0.004671	5.8342	-5	9.96357	-0.2	-1	0.918347	97.9722	20.9657	545.798	12.2553	16.8377	-0.1	-5	8551.41	0.843457	38.2884	3.98045	58.148	-5	2.08498	29.2821	N/A	N/A	-1	2.0955	1.7605	-1
HS18-128A	altered mafic dyke	Rogerson Lake Conglomerate	518293	5368419	21	NAD83				42.6981	12.9272	10.0463	3.32473	6.05	9.03964	5.06859	9.43015	1.25353	0.375767	1.65954	0.190804	0.161912	189.529	116.106	99.7876	0.844058	38.3071	15.3685	99.1803	272.684	25.4223	-0.1	6.31443	0.29321	46.3172	3.50276	19.4648	-1	38.3118	4.59324	14.9206	233.837	146.211	N/A	N/A	12.288	1.393	180.728	25.0435
HS18-128B	altered mafic dyke	Rogerson Lake Conglomerate	518293	5368419	21	NAD83				58.7129	16.5587	13.2918	10.9476	2.11	11.96	0.543516	0.935967	1.07911	1.19764	2.19464	0.284695	0.22038	238.929	152.337	382.126	1.12733	50.0728	4.83661	99.856	235.103	29.1667	0.188342	9.41191	0.490615	46.4539	6.34287	9.37827	-1	50.6598	10.2598	40.1849	312.924	132.286	N/A	N/A	16.058	6.778	124.628	35.2735
HS18-129A	mineralized quartz vein	Rogerson Lake Conglomerate	517333	5367959	21	NAD83				96.8682	1.14385	1.05163	NA	NA	0.946255	0.0933359	0.0583664	0.062232	0.140365	0.0744359	0.00762265	0.0184737	12.3364	19.227	28.1115	-0.2	-1	0.129728	99.6482	97.3301	72.073	0.279781	3.1377	-0.1	-5	65.4632	0.518639	-1	3.24622	4.38031	-5	6.18529	6.03107	N/A	N/A	-1	1.855	6.9475	2.6875
HS18-129B	mineralized quartz vein	Rogerson Lake Conglomerate	517335	5367962	21	NAD83				95.9293	0.607636	1.07312	NA	NA	0.965597	0.0421612	0.0446669	0.0336177	0.0904042	0.0342228	0.00954133	0.0164458	6.01545	10.6835	16.8635	-0.2	-1	0.089955	97.971	63.5862	46.3412	0.742124	2.40916	-0.1	-5	274.478	1.26699	3.37515	3.05656	4.56717	-5	3.90594	5.79024	N/A	N/A	-1	1.458	5.5905	2.6445
HS18-130A	mineralized quartz vein	Rogerson Lake Conglomerate	517340	5367965	21	NAD83				97.7111	0.15512	1.91422	0.336601	1.42	1.72242	-0.02	0.0190383	0.026461	0.0276235	0.0106946	0.00885278	0.00214088	4.32431	-5	4.83344	-0.2	-1	0.419497	100.305	57.3787	1936.13	16.4589	10.3817	-0.1	-5	4526.74	0.783305	25.849	4.40615	151.804	-5	1.9028	29.0026	N/A	N/A	-1	2.108	1.0485	-1
HS18-130B	mineralized quartz vein	Rogerson Lake Conglomerate	518345	5368221	21	NAD83				97.1876	0.570323	1.22878	NA	NA	1.10565	-0.02	0.0209605	0.0411511	0.106376	0.0175975	0.0093446	0.00340594	5.29875	5.88335	19.9642	-0.2	-1	0.289681	99.4807	47.0568	1097.37	7.26674	29.461	-0.1	6.91684	2516.14	4.95875	2.26558	3.36301	322.584	-5	5.28819	31.2054	N/A	N/A	-1	3.8325	2.8215	-1
HS18-130C	altered conglomerate	Rogerson Lake Conglomerate	518345	5368221	21	NAD83				73.2926	13.5296	4.20047	3.25612	0.85	3.77959	0.136293	0.188415	0.56718	3.19619	0.617044	0.110278	0.107607	55.1132	136.361	675.222	1.31617	14.4267	2.47802	98.4237	310.128	1242.17	0.32793	6.3568	0.14021	21.1637	305.786	4.24897	2.10525	17.8694	9.57163	114.032	90.1337	58.1713	N/A	N/A	13.3545	2.0205	52.4895	19.4215
HS18-130D	altered conglomerate	Rogerson Lake Conglomerate	518345	5368221	21	NAD83				76.8894	12.4258	3.89846	3.30963	0.53	3.50784	0.113226	0.0936248	0.491084	3.07385	0.534328	0.110558	0.0830559	30.0938	122.928	730.052	1.37195	11.8221	2.1485	99.8618	290	676.877	0.156357	4.92602	0.223961	13.5627	89.9709	4.97062	-1	18.8313	11.2128	104.524	70.4004	56.7962	N/A	N/A	11.9745	1.5345	49.1295	14.7715
HS18-130E	mineralized quartz vein	Rogerson Lake Conglomerate	518345	5368221	21	NAD83				94.626	1.0459	1.95049	0.506191	1.3	1.75505	0.0246427	0.0486539	0.0652214	0.220922	0.0425207	0.0144086	0.0185924	6.59269	10.065	44.1222	0.208426	1.37463	0.749475	98.8069	81.1647	288.314	5.44338	18.6754	0.106447	35.1544	613.417	3.28793	1.868	9.59512	159.215	-5	9.37301	18.5007	N/A	N/A	1.7865	2.8915	6.8735	2.7435
HS18-130E-2	sample duplicate	Rogerson Lake Conglomerate	518345	5368221	21	NAD83				96.0532	0.23077	2.04148	0.352756	1.52	1.83692	-0.02	0.0372059	0.0188649	0.0378898	0.0102841	0.0134669	-0.002	14.6746	-5	12.0797	-0.2	-1	0.429699	98.8798	19.7407	1065.14	10.9889	16.432	0.226681	-5	2558.74	0.474885	2.00866	2.59017	193.827	-5	1.65835	60.0434	N/A	N/A	-1	2.9275	1.5725	-1
HS19-016	sandstone	Wigwam Formation	597358	5420397	21	NAD83				70.52	8.75	3.38	1.55	1.65	3.04132	1.64	3.49	2.04	1.72	0.665	0.05	0.146	175	512	274	1.4	8	5.83	98.24	246	-100	-0.1	10	0.1	10	13	5.5	-1	30	8	50	N/A	34	N/A	N/A	11	1	147	25
HS19-017	basalt	Laurenceton Formation	596316	5420033	21	NAD83				49.73	14.3	14.22	10.61	3.25	12.7952	3.41	6.89	4.09	0.77	2.782	0.161	0.752	14	208	211	1.3	33.4	1.58	98.7	387	-100	-0.1	24	0.4	28	34	17.6	-1	20	1	20	N/A	89	N/A	N/A	20	2	437	42
HS19-018	basalt	Laurenceton Formation	594983	5420408	21	NAD83				49.19	15.75	10.85	4.78	5.46	9.76283	5.83	8.55	3.17	0.24	1.659	0.164	0.229	160	123	142	0.7	28.8	2.89	98.52	153	-100	0.2	12	0.3	46	35	18.4	-1	76	-1	8	N/A	84	N/A	N/A	18	2	420	25
HS19-021	monzogranite	Wilding Lake granite	519318	5363207	21	NAD83				69.23	13.9	4.46	0.53	3.54	4.01311	0.55	1.26	3.59	4.5	0.463	0.098	0.109	15	398	579	4.1	12.5	0.78	98.94	374	-100	-0.1	3	0.1	5	5	47.9	-1	9	25	194	N/A	67	N/A	N/A	25	1	75	64
HS19-022	monzogranite	Peter Strides granite	518840	5362038	21	NAD83				71.27	12.98	4.55	2	2.29	4.09409	0.78	0.2	3	5.34	0.474	0.018	0.072	9	349	528	1.8	15.8	0.6	99.28	541	-100	-0.1	-1	-0.1	2	1	13.5	-1	7	10	195	N/A	40	N/A	N/A	22	1	30	58
HS19-024	foliated Mu-Bt monzogranite	Peter Strides granite	514109	5357767	21	NAD83				74.52	12.64	1.96	0.41	1.4	1.76361	0.4	0.58	3.26	5.03	0.26	0.026	0.047	6	175	372	3.3	4.5	0.63	99.36	331	-100	-0.1	-1	-0.1	3	2	5.2	-1	5	18	218	N/A	24	N/A	N/A	19	1	47	40
HS19-025	monzogranite	Wilding Lake granite	519299	5363305	21	NAD83				69.1	13.91	4.22	0.66	3.2	3.79716	0.51	1.15	3.53	4.84	0.434	0.091	0.103	13	336	543	3.8	11.3	0.87	98.76	372	-100	-0.1	3	0.1	5	4	24.3	-1	9	23	217	N/A	73	N/A	N/A	23	2	74	61
HS19-027	sandstone	Wigwam Formation	521984	5365241	21	NAD83				78.5	10.23	3.51	1.27	2.02	3.1583	0.69	0.24	2.47	1.65	0.522	0.047	0.091	62	187	287	1.3	8.3	1.63	99.58	232	-100	-0.1	4	0.1	14	29	26.3	-1	30	26	59	N/A	56	N/A	N/A	12	1	94	23
HS19-030	dacitic volcaniclastic rock	Laurenceton Formation	529891	5375386	21	NAD83				49.5	14.49	12.84	2.31	9.48	11.5534	4.8	7.73	4.31	1.14	1.461	0.214	0.157	60	106	80	0.5	39.8	1.94	98.58	165	N/A	0.3	-1	0.4	39	75	14.1	-1	32	-1	15	N/A	104	N/A	N/A	18	1	170	34
HS19-031	psammite-semipelite	Meelpaag Nappe	529669	5369910	21	NAD83				73.32	11.99	2.79	0.31	2.23	2.51044	2.67	0.32	5.29	0.07	0.918	0.017	0.135	11	199	9	0.7	10	1.71	99.23	436	297	-0.1	1	-0.1	7	2	4	-1	14	-1	7	N/A	18	N/A	N/A	17	1	33	54
HS19-034A	syenite	Sandy Lake syenite	570659	5392657	21	NAD83				57.41	13.94	9.34	2.97	5.73	8.40413	0.84	2.72	5.01	1.73	1.003	0.234	0.318	7	571	495	2.9	16.2	6.44	98.98	712	-100	-0.1	5	0.4	9	14	6.2	2	11	13	59	N/A	136	N/A	N/A	29	2	147	78
HS19-034B	syenite	Sandy Lake syenite	570652	5392655	21	NAD83				56.77	14.01	9.83	3.86	5.38	8.84503	0.9	2.38	5.58	1.86	1.108	0.254	0.391	5	295	326	2.5	16.4	6.12	99.21	804	3151	-0.1	3	0.4	11	13	11.3	2	12	12	56	N/A	138	N/A	N/A	28	2	143	74
HS19-034C	veined and altered syenite	Sandy Lake veined and altered syenite	570649	5392652	21	NAD83				62.74	13.48	7.74	2.58	4.64	6.96445	0.6	1.85	3.26	2.76	0.837	0.211	0.427	5	570	357	2.4	12.1	5.28	99.19	666	-100	0.2	102	0.5	7	20	8.7	1	10	84	70	N/A	143	N/A	N/A	28	2	88	76
HS19-036	basalt	Laurenceton Formation	576786	5396694	21	NAD83				56.8	13.78	11.57	5.85	5.15	10.4107	1.38	4.76	3.62	2.22	1.325	0.256	0.446	5	346	395	2.4	26	2.85	99.01	475	1687	-0.1	30	0.4	10	9	21.6	2	13	9	73	N/A	136	N/A	N/A	26	2	199	64
HS19-038	basalt	Diversion Lake Group	589086	5407933	21	NAD83				52.16	13.41	9.93	3.38	5.9	8.93501	3.05	13.31	1.47	0.35	1.886	0.136	0.198	63	145	35	1.5	25.5	4.47	100.37	201	-100	0.2	3	0.4	33	71	10.1	1	30	-1	6	N/A	75	N/A	N/A	26	2	61	23
HS19-040	limestone	Pine Falls Formation?	565204	5389879	21	NAD83				0.69	0.16	0.12	NA	NA	0.107976	21.06	29.96	0.16	0.41	0.02	0.004	0.047	3	10	6	-0.2	-1	45.53	98.15	424	-100	-0.1	-1	-0.1	-1	1	6.9	-1	4	-1	-5	N/A	5	N/A	N/A	-1	-1	61	-1
HS19-041	basalt	Pine Falls Formation?	560199	5389120	21	NAD83				45.85	14.36	12.91	4.84	7.26	11.6164	8.06	12.66	2.36	0.64	1.335	0.2	0.097	346	109	75	0.3	39.4	1.93	100.41	58	145	-0.1	-1	0.4	53	55	6.9	-1	99	-1	9	N/A	83	N/A	N/A	16	2	208	20
HS19-056	basalt	Fogo Harbour Formation	679524	5484920	21	NAD83				56	12.23	12.28	3.38	8.01	11.0495	1.76	4.33	3.56	2.17	1.799	0.194	0.796	4	748	762	1.3	27.8	4.33	99.43	845	-100	-0.1	2	0.3	18	10	23.1	2	15	29	59	N/A	164	N/A	N/A	24	1	334	59
HS19-057	rhyolite	Fogo Harbour Formation	679613	5485658	21	NAD83				74.56	11.21	3.07	0.57	2.25	2.76239	0.02	0.72	4.23	3.58	0.17	0.038	0.01	3	363	619	3	1.9	0.95	98.56	99	580	-0.1	2	-0.1	-1	2	2.9	1	5	20	101	N/A	41	N/A	N/A	25	2	119	79
HS19-063	gabbro dyke	Silurian dyke-Moosehead showing drillhole: MH-19-62_24m	614068	5428472	21	NAD83				36.96	14.56	12.88	0.78	10.89	11.5894	3.21	6.46	1.83	2.09	2.86	0.207	0.315	38	243	518	1.8	41.5	16.79	98.16	246	-100	-0.1	33	0.4	44	31	22.9	-1	25	-1	61	N/A	88	N/A	N/A	23	1	416	47
HS19-064	sandstone	Wigwam Formation-Moosehead showing drillhole: MH-19-62_97m	614068	5428472	21	NAD83				61.56	9.76	4.96	0.04	4.43	4.46301	2.22	5.21	1.2	2.01	1.302	0.079	0.291	370	970	385	1.2	15.8	10.04	98.63	385	-100	-0.1	58	0.2	15	15	27.2	-1	43	10	60	N/A	50	N/A	N/A	16	-1	216	46
HS19-065	gabbro dyke	Silurian dyke-Moosehead showing drillhole MH-19-62_197.7m	614068	5428472	21	NAD83				43.48	13.16	12.21	1.9	9.28	10.9866	5.52	6.59	2.88	0.79	2.208	0.189	0.275	75	186	460	1.1	38.2	12.24	99.54	208	241	-0.1	4	0.3	38	28	53.4	-1	24	-1	21	N/A	89	N/A	N/A	20	-1	389	41
HS19-067	sandstone	Charles Cove Formation	654175	5429242	21	NAD83				66.04	11.67	4.52	0.69	3.45	4.0671	2.57	3.87	2.29	3.09	0.683	0.063	0.148	95	346	513	1.5	10.7	5.24	100.17	437	-100	-0.1	2	0.1	12	11	26.3	-1	33	14	90	N/A	54	N/A	N/A	17	-1	157	30
Paradise Lake Gold	quartz veined monzonite	Paradise Lake monzonite	600720	5398250	21	NAD27				88.8505	4.43184	1.90931	0.664989	1.12	1.718	0.0622099	0.0738227	0.0411966	1.09453	0.130375	0.0239186	0.0161015	2.93627	166.101	140.402	1.93618	4.75348	2.70919	99.343	129.01	N/A	-0.1	1.90284	N/A	N/A	2.81608	81.6905	N/A	4.26058	4.20049	39.6515	20.7306	31.5194	N/A	-1	10.266	1.7575	18.795	22.3215
[truncated: 52 more columns]
